# Supplementary material for: Ruthenium Complexes with Protic Ligands: Influence of the Position of OH Groups and π Expansion on Luminescence and Photocytotoxicity
Source: MDPI journal article supplement (doi:10.3390/ijms24065980), 2023-03-22
Supplement: s1 [file s1]

*Supporting Information for*

**Ruthenium Complexes with Protic Ligands: Influence of the Position of OH Groups and Pi Expansion on Luminescence and Photocytotoxicity**

Oladipupo, Olaitan E.;<sup>I</sup> Prescott, Meredith C.;<sup>I</sup> Blevins, Emily R.;<sup>I</sup> Gray, Jessica L.;<sup>I</sup> Cameron, Colin G.;<sup>II</sup> Qu, Fengrui;<sup>I</sup> Ward, Nicholas A.;<sup>I</sup> Pierce, Abigail L.;<sup>I</sup> Collinson, Elizabeth R.;<sup>I</sup> Hall, James Fletcher;<sup>I</sup> Park, Seungjo;<sup>III, IV</sup> Kim, Yonghyun;<sup>III</sup> McFarland, Sherri A.;<sup>II</sup> Fedin, Igor;<sup>I, a</sup> Papish, Elizabeth T.<sup>I, b</sup>

<sup>I</sup>The University of Alabama, Department of Chemistry and Biochemistry, Tuscaloosa, Alabama 35487, USA

<sup>II</sup>University of Texas Arlington, Department of Chemistry and Biochemistry, Arlington, Texas 76019, USA

<sup>III</sup>The University of Alabama, Department of Chemical and Biological Engineering, Tuscaloosa, Alabama 35487, USA

<sup>IV</sup>Present Address: Cytiva, 170 Locke Dr, Marlborough, MA 01752, USA.

<sup>a</sup>Corresponding author e-mail: [ifedin@ua.edu](mailto:ifedin@ua.edu), phone: 205-348-7020

<sup>b</sup>Corresponding author e-mail: [etpapish@ua.edu](mailto:etpapish@ua.edu), phone: 205-348-5822

## Table of Contents

|                                                                                                                                                                                                                      |       |
|----------------------------------------------------------------------------------------------------------------------------------------------------------------------------------------------------------------------|-------|
| Characterization of <b>5<sub>B</sub></b> , <b>6<sub>B</sub></b> , <b>7<sub>B</sub></b> , and <b>7<sub>A</sub></b> .....                                                                                              | 3-7   |
| UV-Vis Spectroscopy <b>5<sub>A</sub></b> , <b>5<sub>B</sub></b> , <b>6<sub>A</sub></b> , <b>6<sub>B</sub></b> , <b>7<sub>A</sub></b> , and <b>7<sub>B</sub></b> .....                                                | 8-10  |
| Luminescence Studies <b>1<sub>A</sub></b> , <b>1<sub>B</sub></b> , <b>5<sub>A</sub></b> , <b>5<sub>B</sub></b> , <b>6<sub>A</sub></b> , <b>6<sub>B</sub></b> , <b>7<sub>A</sub></b> , and <b>7<sub>B</sub></b> ..... | 11-14 |
| Photoluminescence (PL) Dynamics of <b>1<sub>A</sub>-8<sub>A</sub></b> , <b>1<sub>B</sub>-8<sub>B</sub></b> .....                                                                                                     | 15-23 |
| Summary of Photophysics for <b>1<sub>A</sub>-8<sub>A</sub></b> , <b>1<sub>B</sub>-8<sub>B</sub></b> .....                                                                                                            | 24    |
| Single Crystal X-Ray Diffraction Data for <b>7<sub>A</sub></b> .....                                                                                                                                                 | 25    |

## Characterization of the Complexes.

### Complex 5<sub>B</sub>

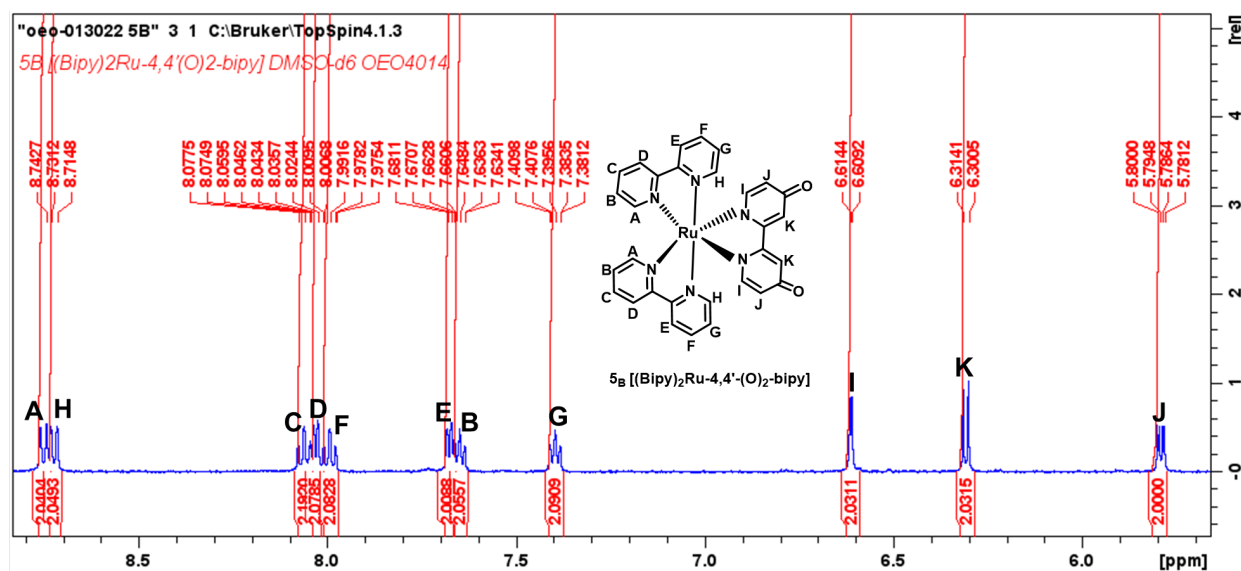

**Figure S1.** 500 MHz <sup>1</sup>H NMR (zoom of the aromatic region) spectrum of 5<sub>B</sub> in DMSO-d<sub>6</sub> at room temperature.

### Complex 6<sub>B</sub>

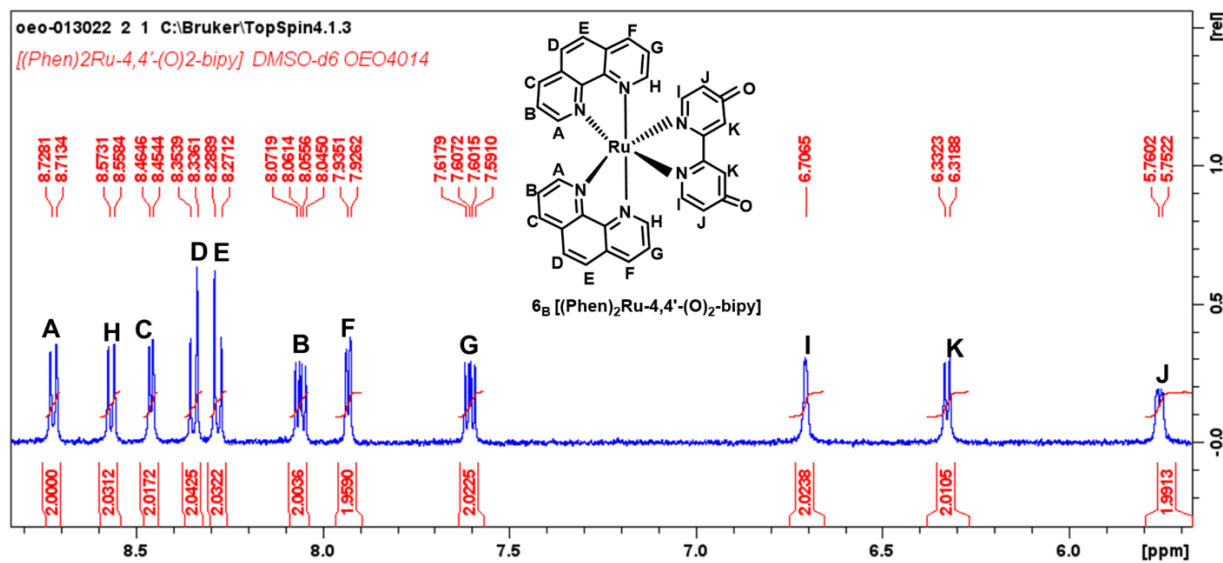

**Figure S2.** 500 MHz <sup>1</sup>H NMR (zoom of the aromatic region) spectrum of 6<sub>B</sub> in DMSO-d<sub>6</sub> at room temperature.

## Complex 7<sub>B</sub>

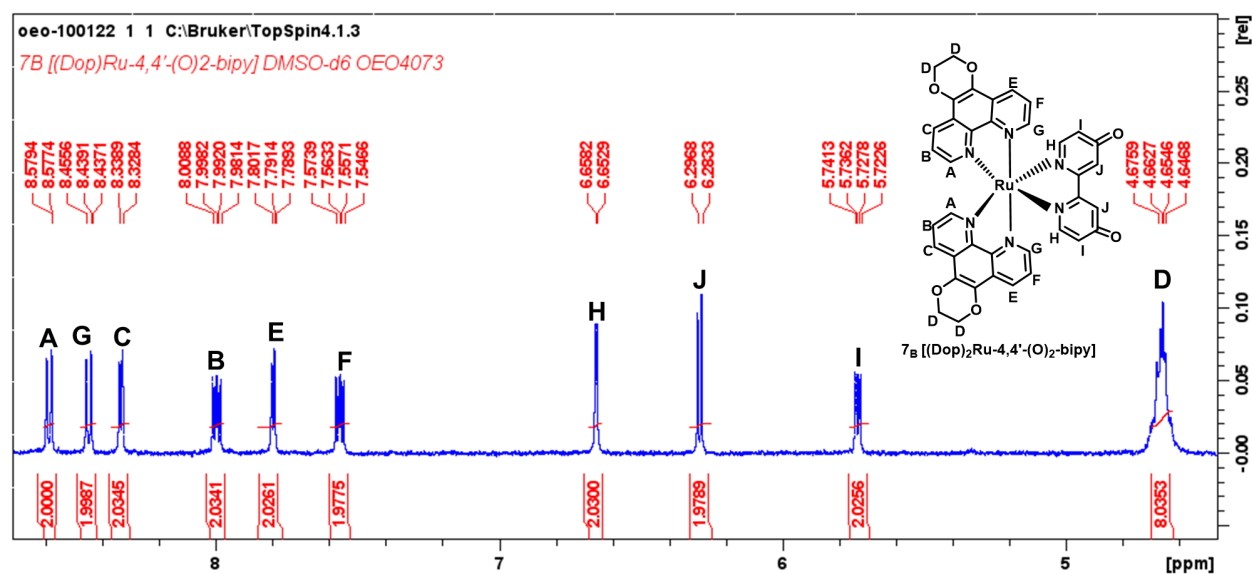

**Figure S3.** 500 MHz <sup>1</sup>H NMR spectrum of 7<sub>B</sub> in DMSO-d<sub>6</sub> at room temperature.

## Complex 7<sub>A</sub>

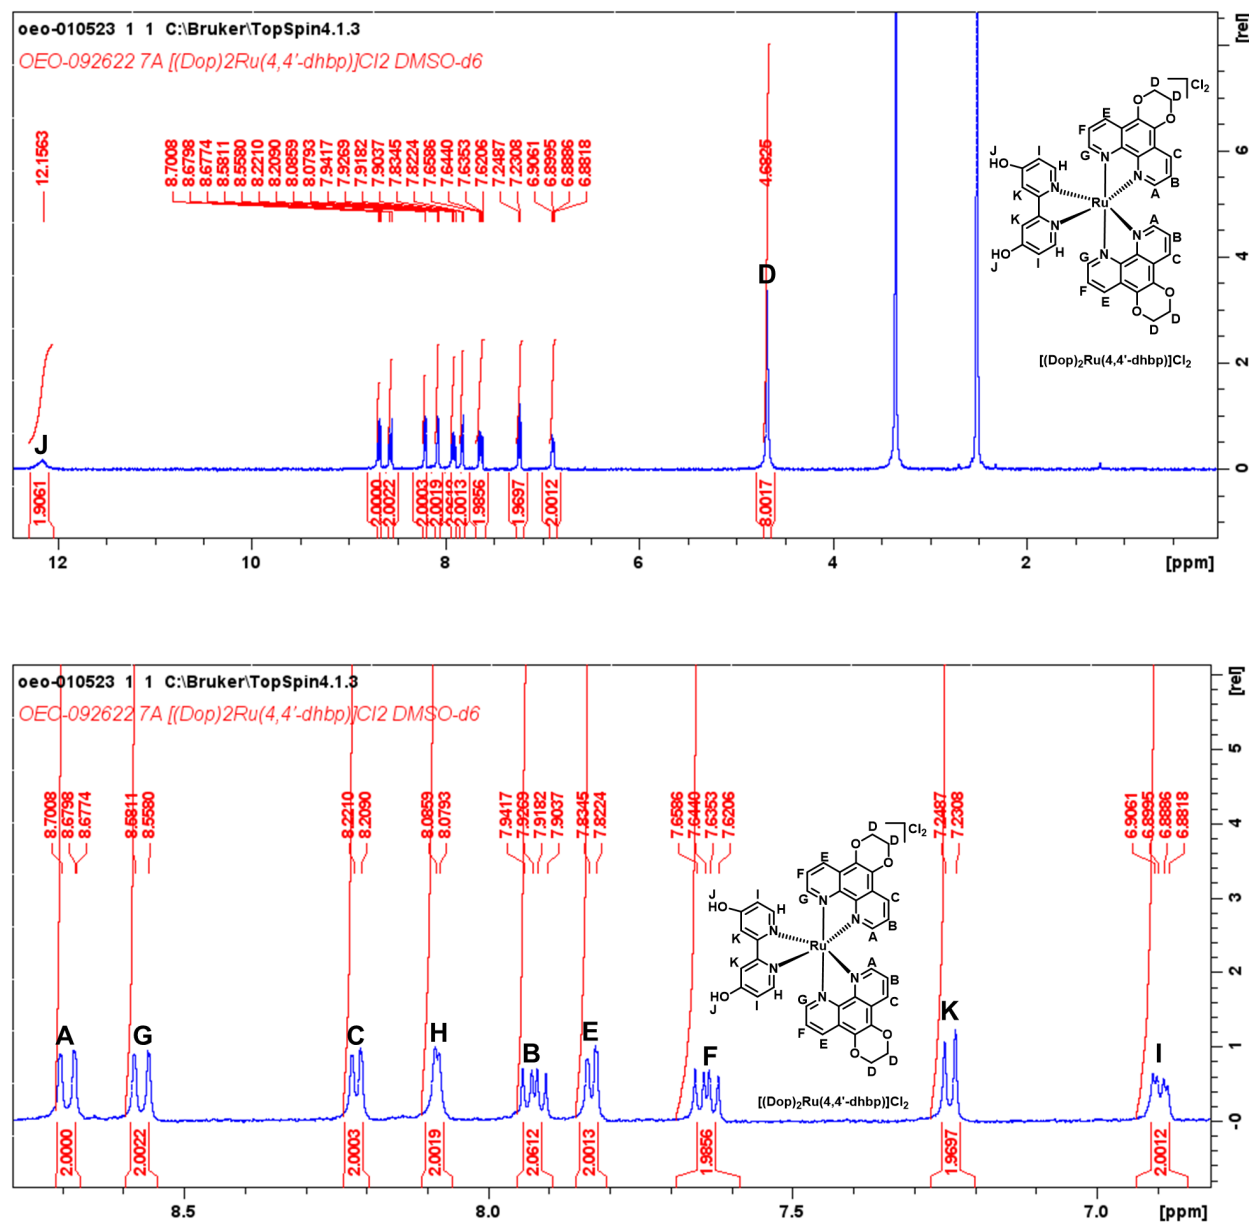

**Figure S4.** 500 MHz <sup>1</sup>H NMR spectrum of 7<sub>A</sub> in DMSO-d<sub>6</sub> at room temperature. Top: Full spectrum. Bottom: Zoom in of the aromatic region

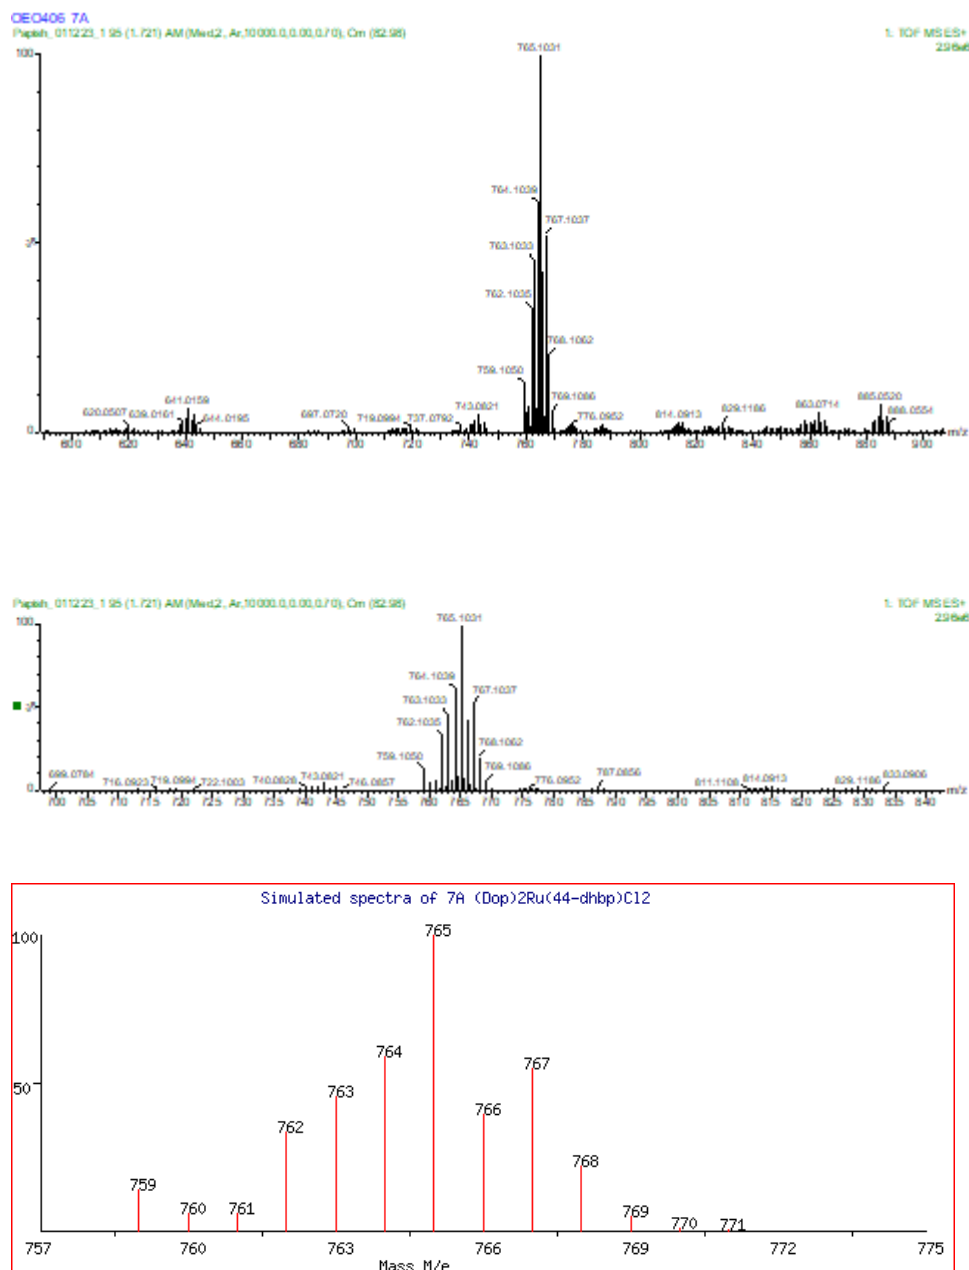

**Figure S5. Top:** High resolution ESI-MS of [(dop)<sub>2</sub>Ru(4,4'-dhbp)]Cl<sub>2</sub> (**7A**). The peak at m/z 765.1031 (calculated: 765.1036) corresponds to C<sub>38</sub>H<sub>27</sub>N<sub>6</sub>O<sub>6</sub>Ru [M-H]<sup>+</sup>. **Middle:** Zoomed view to show the isotopic distribution. **Bottom:** Simulated spectra of **7A** [M-H]<sup>+</sup>.

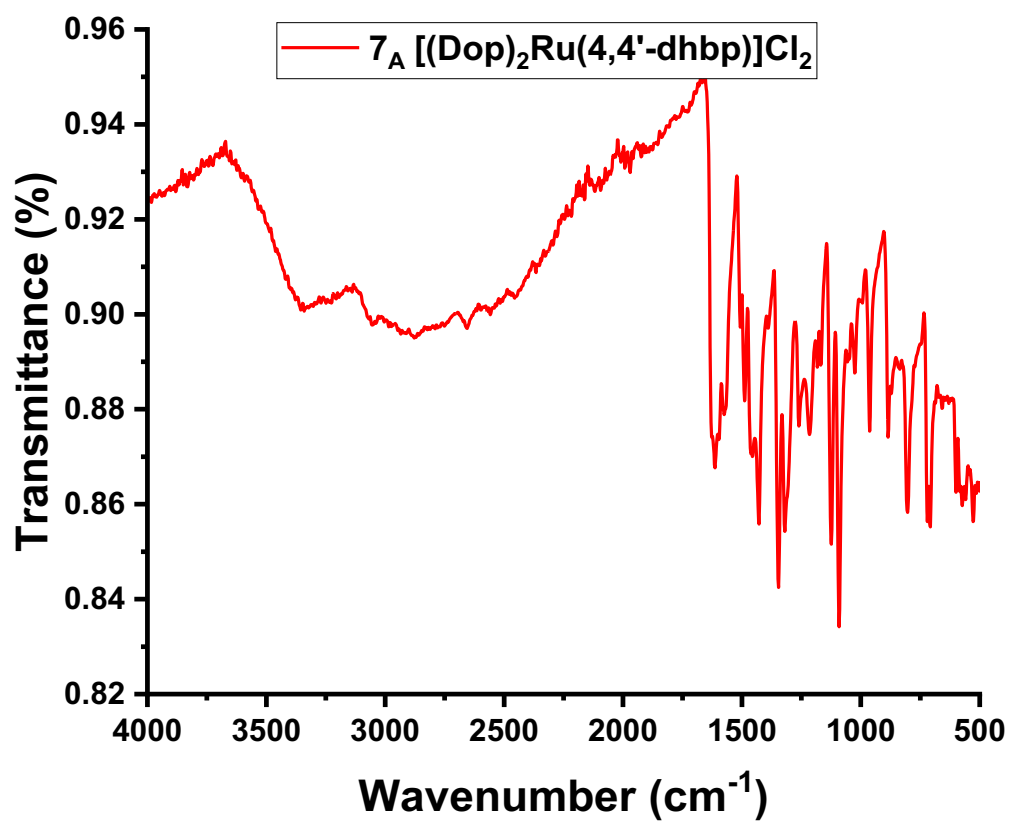

**Figure S6.** IR spectrum of **7<sub>A</sub>**. The observed vibrations include (in cm<sup>-1</sup>): 3069, 2643, 1617, 1570, 1486, 1464, 1434.

**UV-Vis Spectroscopy** (Selected complexes are shown here, those not included were published previously)

**Complexes  $5_A$  and  $5_B$ :**

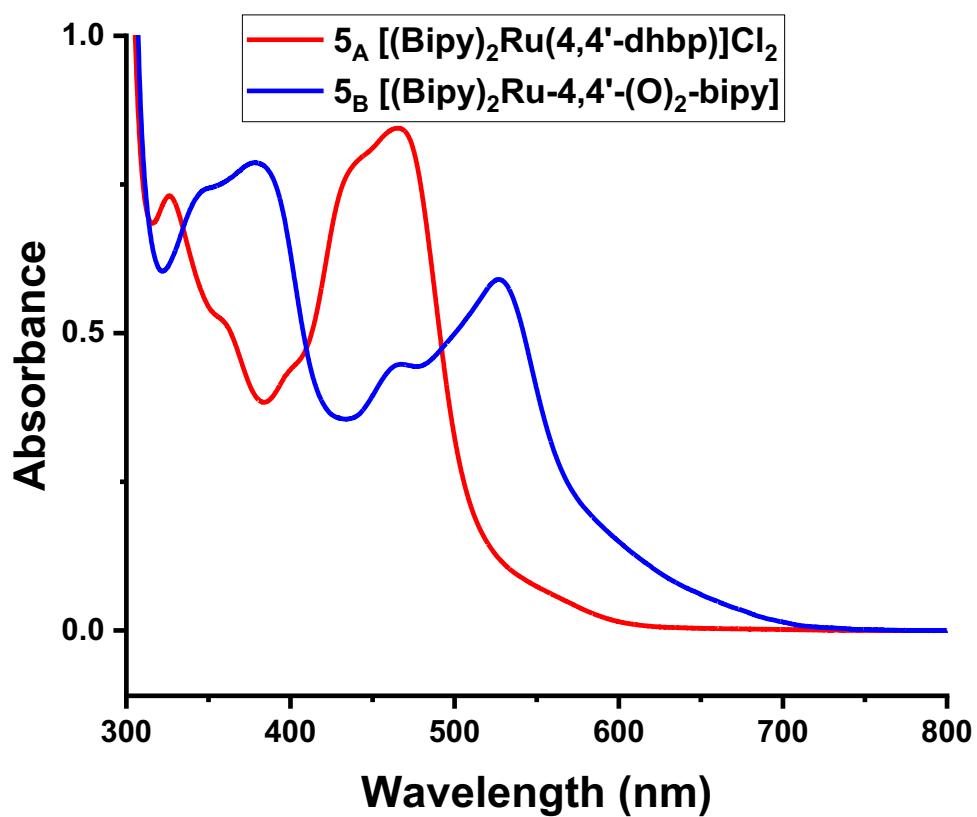

**Figure S7.** Overlaid UV-Vis spectra of  $5_A$  and  $5_B$  in acetonitrile at room temperature



## Complexes **6<sub>A</sub>** and **6<sub>B</sub>**

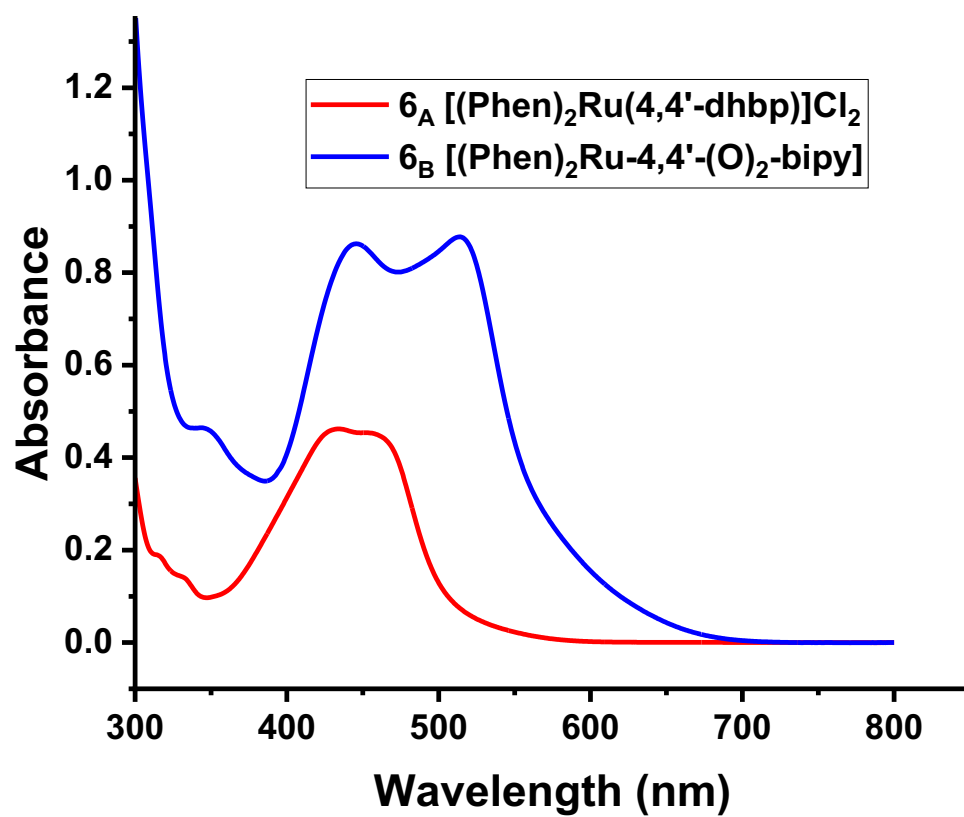

**Figure S8.** Overlaid UV-Vis spectra of **6<sub>A</sub>** and **6<sub>B</sub>** in acetonitrile at room temperature

Complexes **7<sub>A</sub>** and **7<sub>B</sub>**

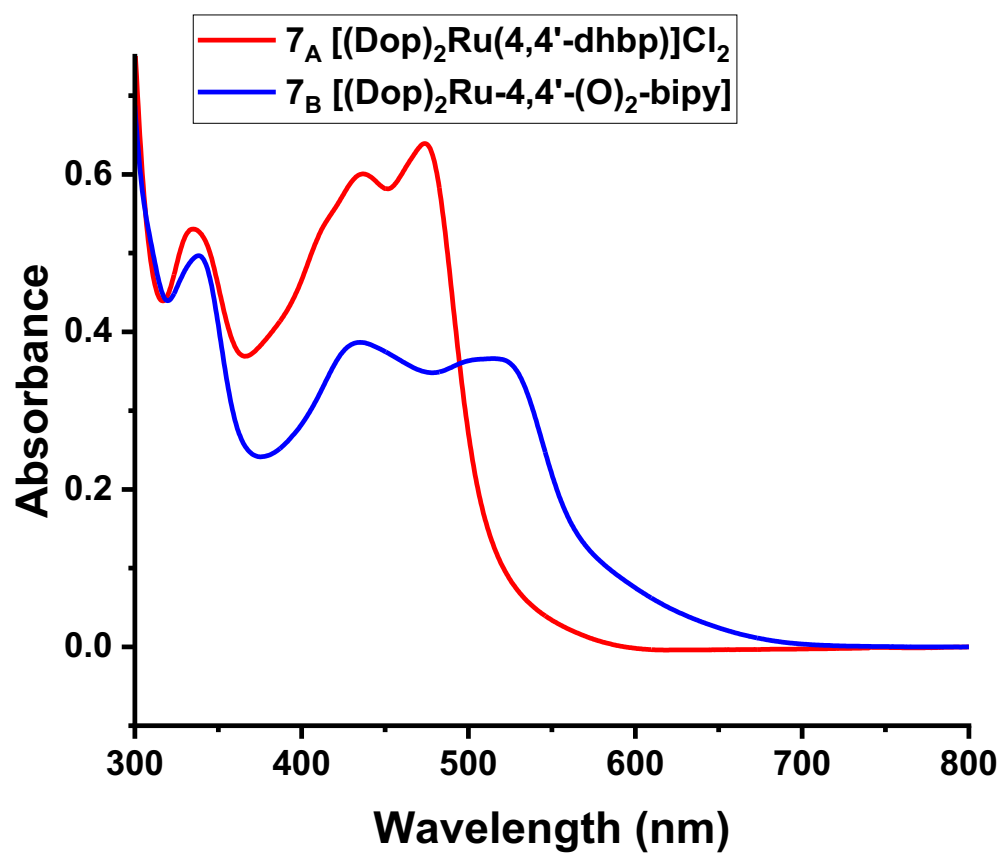

**Figure S9.** Overlaid UV-Vis spectra of **7<sub>A</sub>** and **7<sub>B</sub>** in acetonitrile at room temperature

**Luminescence Studies** (Selected complexes are shown here, those not included were published previously)

**Complexes  $1_A$  and  $1_B$**

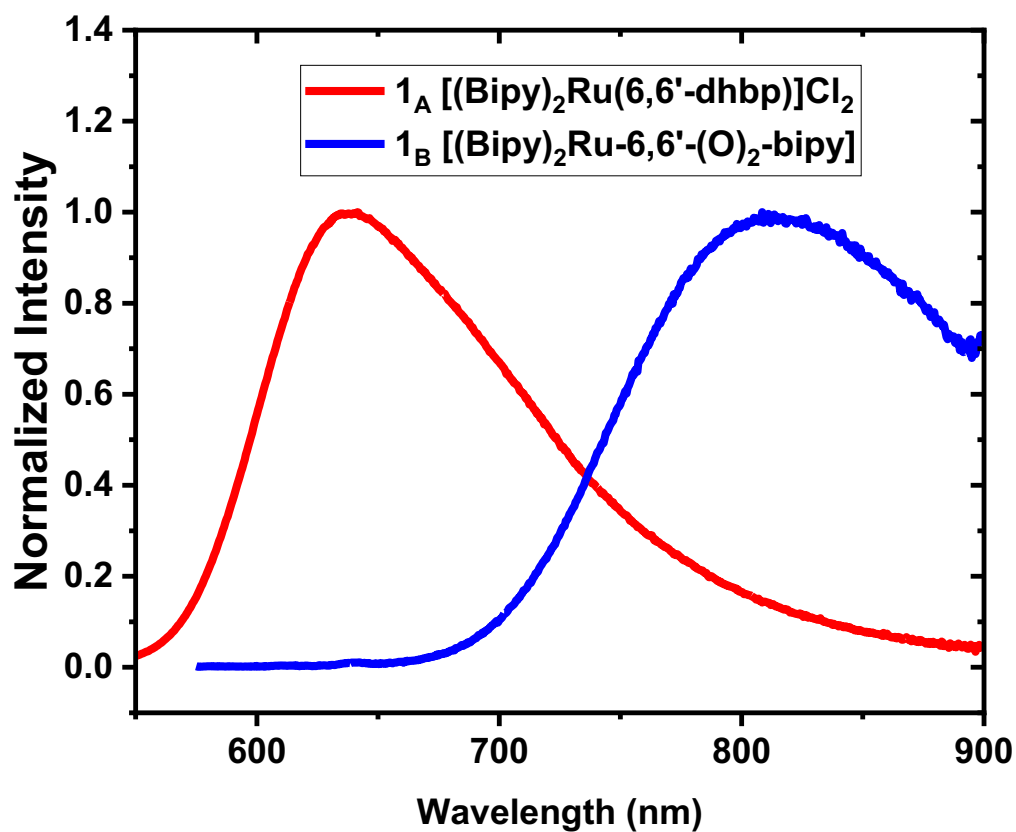

**Figure S10.** Room temperature overlaid photoluminescence spectra of  $1_A$  and  $1_B$  in acetonitrile

Complexes **5<sub>A</sub>** and **5<sub>B</sub>**

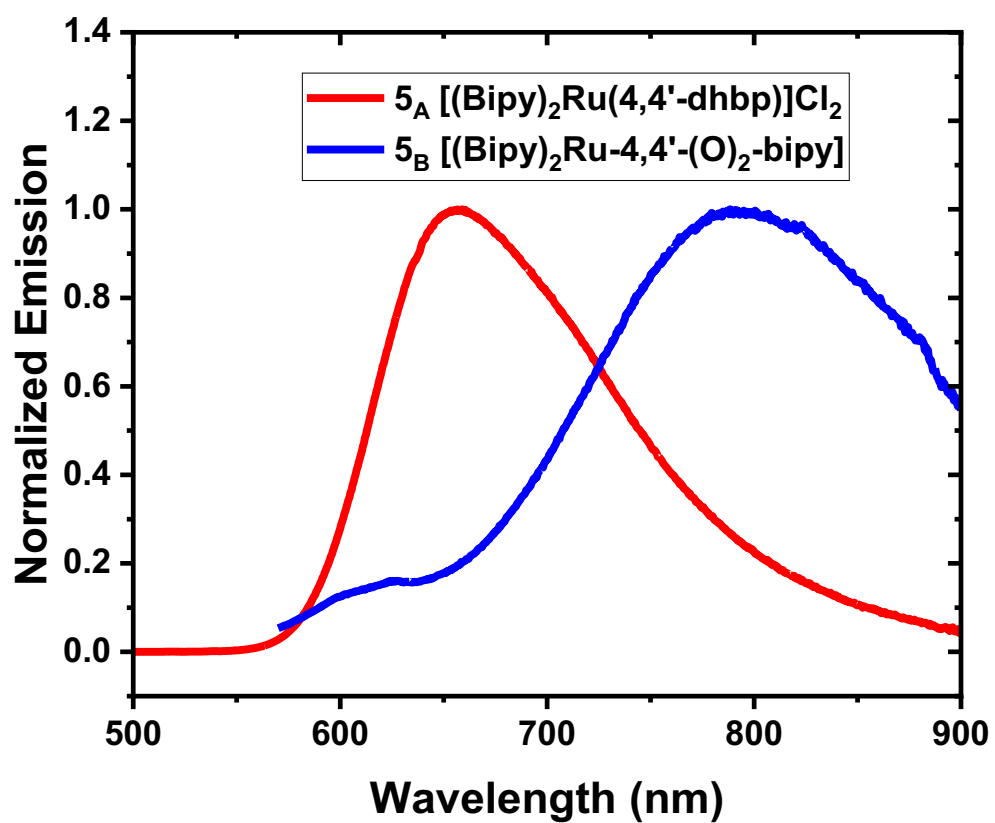

**Figure S11:** Room temperature overlaid photoluminescence spectra of **5<sub>A</sub>** and **5<sub>B</sub>** in acetonitrile

Complexes **6<sub>A</sub>** and **6<sub>B</sub>**

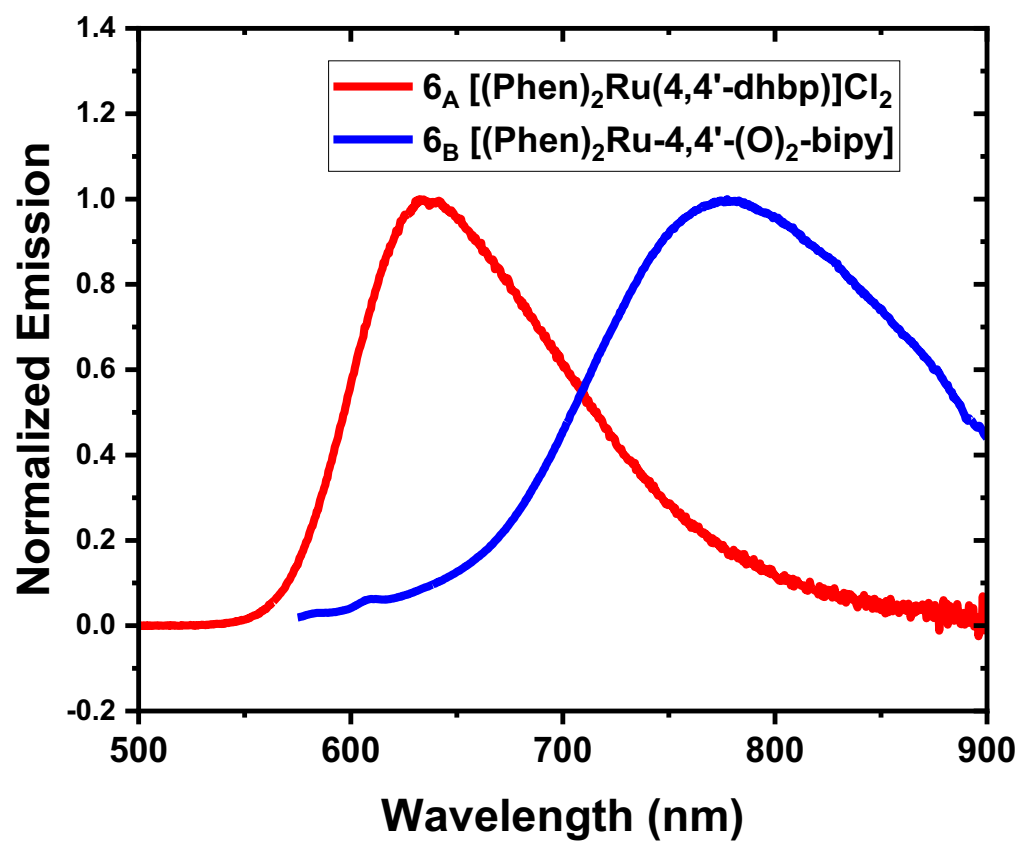

**Figure S12:** Room temperature overlaid photoluminescence spectra of **6<sub>A</sub>** and **6<sub>B</sub>** in acetonitrile

Complexes  $7_A$  and  $7_B$

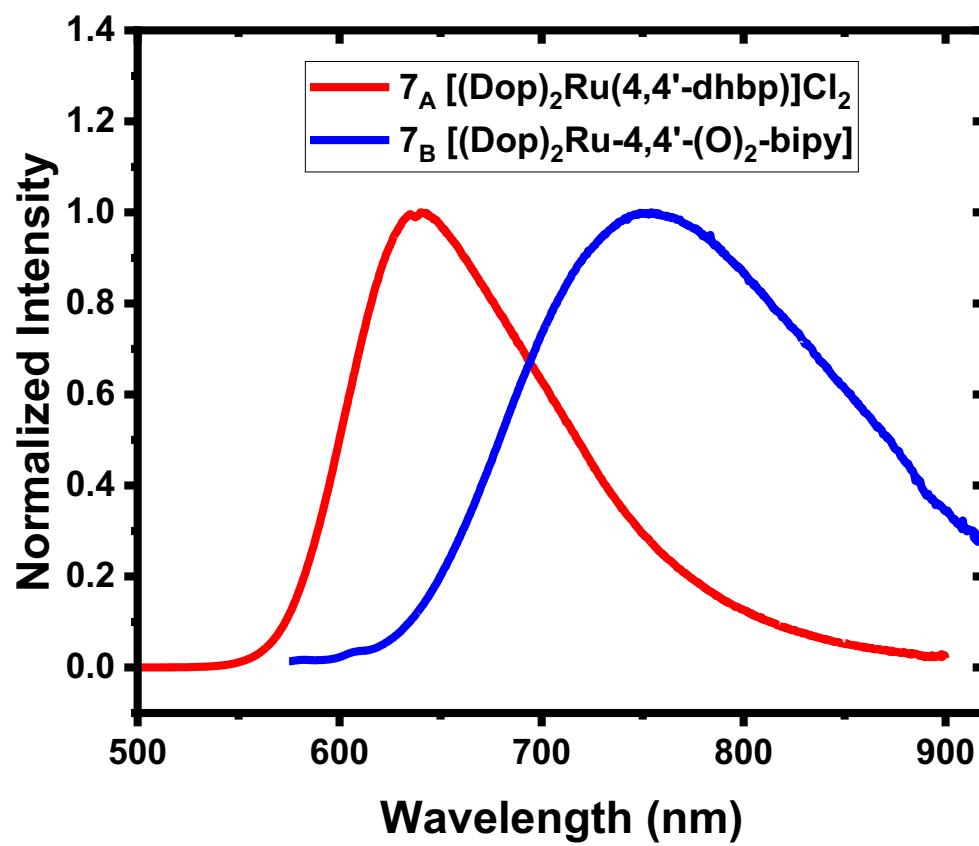

**Figure S13:** Room temperature overlaid photoluminescence spectra of  $7_A$  and  $7_B$  in acetonitrile

## Photoluminescence (PL) Dynamics Studies

### Complex 1<sub>A</sub>

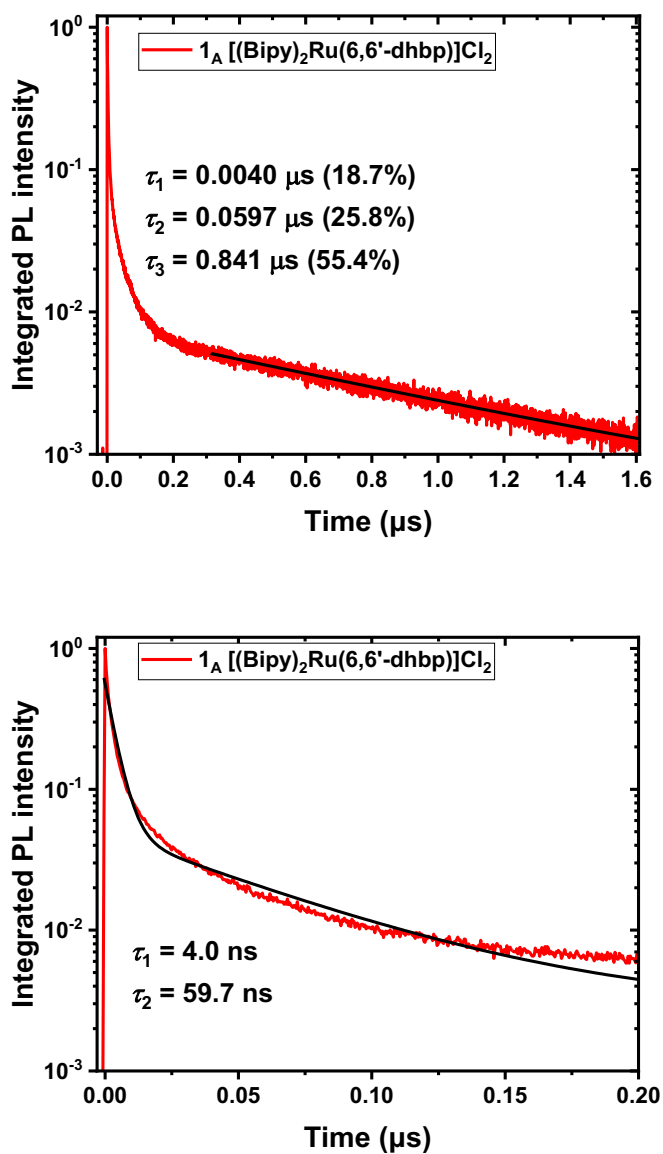

**Figure S14.** PL dynamics of 1<sub>A</sub> in deaerated acetonitrile excited at 404 nm. Top: full decay curve. Bottom: zoom in on the first 200 ns. Percentage indicates the fraction of all light that is emitted through the corresponding channel.

## Complex 1<sub>B</sub>

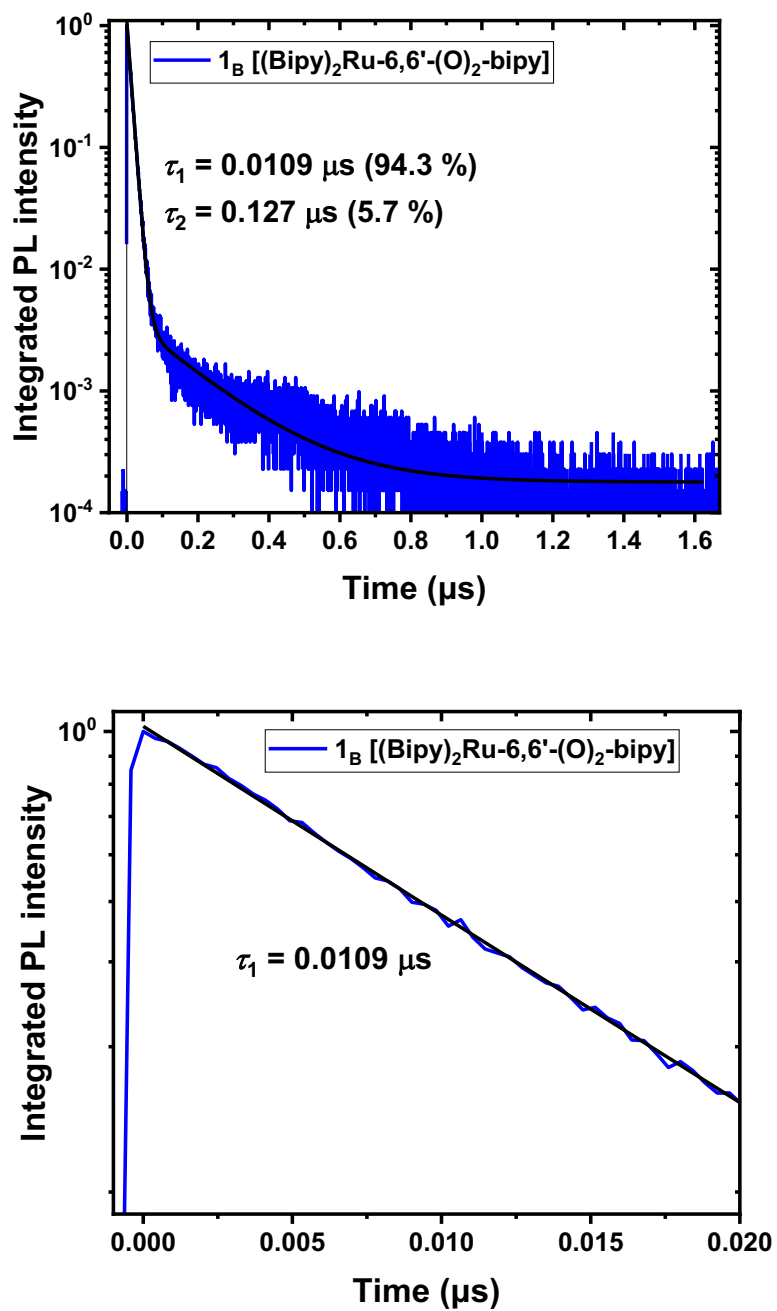

**Figure S15.** PL dynamics of **1<sub>B</sub>** in deaerated acetonitrile excited at 404 nm. Top: full decay curve. Bottom: zoom in on the first 20 ns. Percentage indicates the fraction of all light that is emitted through the corresponding channel.



## Complexes **2<sub>A</sub>** and **2<sub>B</sub>**

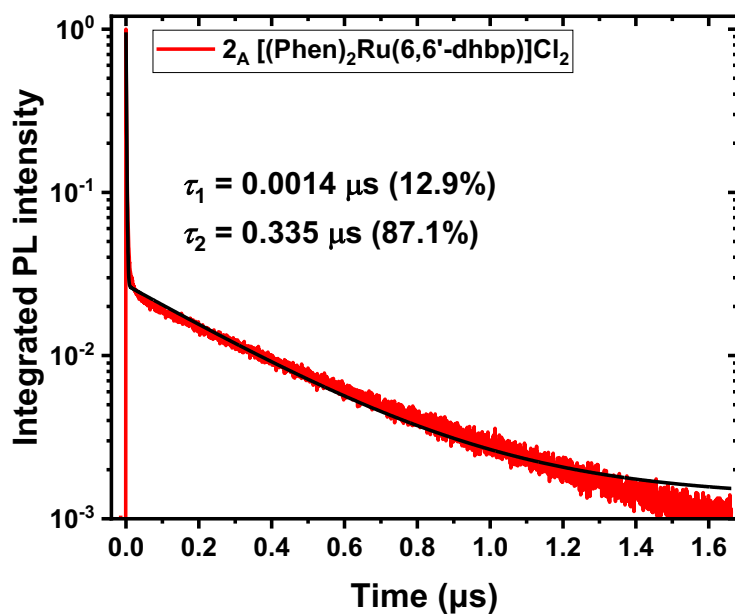

**Figure S16.** PL dynamics of **2<sub>A</sub>** in deaerated acetonitrile excited at 404 nm. Percentage indicates the fraction of all light that is emitted through the corresponding channel.

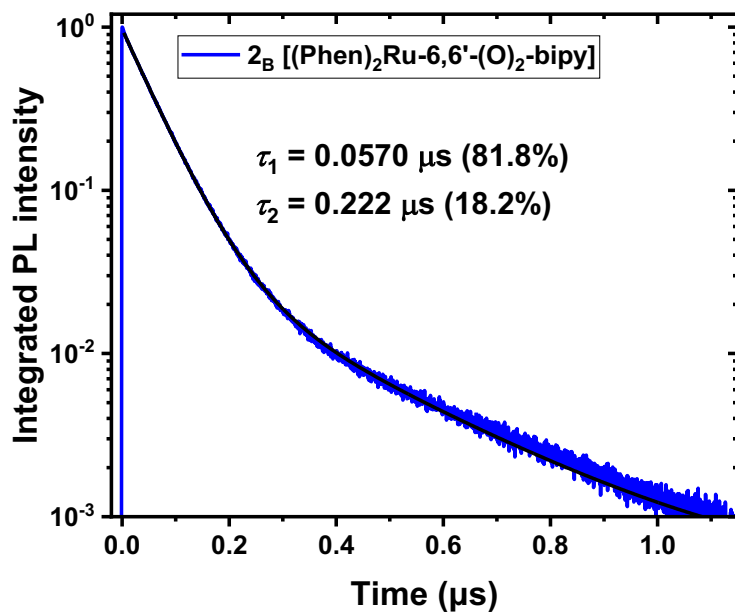

**Figure S17.** PL dynamics of **2<sub>B</sub>** in deaerated acetonitrile excited at 404 nm. Percentage indicates the fraction of all light that is emitted through the corresponding channel.

## Complexes $3_A$ and $3_B$

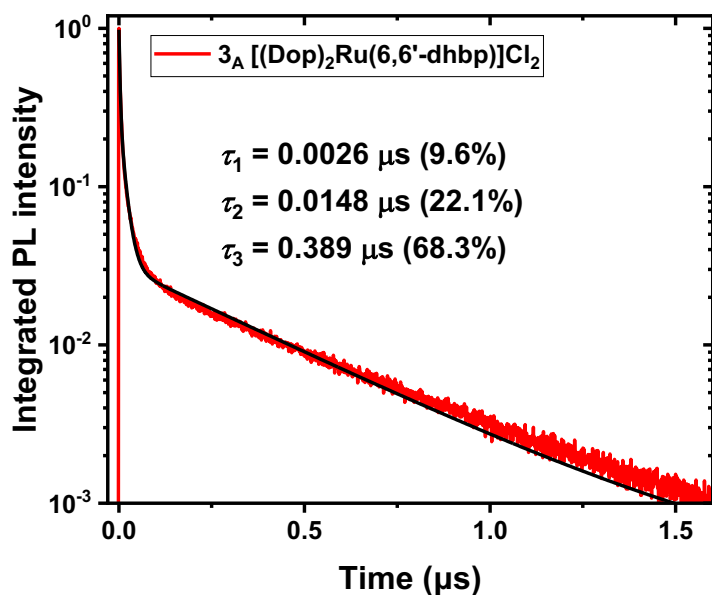

**Figure S18.** PL dynamics of  $3_A$  in deaerated acetonitrile excited at 404 nm. Percentage indicates the fraction of all light that is emitted through the corresponding channel.

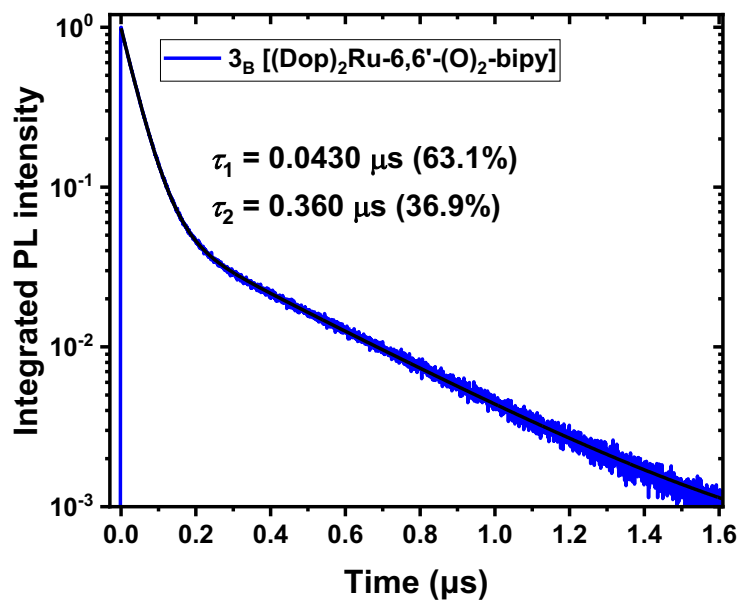

**Figure S19.** PL dynamics of  $3_B$  in deaerated acetonitrile excited at 404 nm. Percentage indicates the fraction of all light that is emitted through the corresponding channel.

## Complexes 4<sub>A</sub> and 4<sub>B</sub>

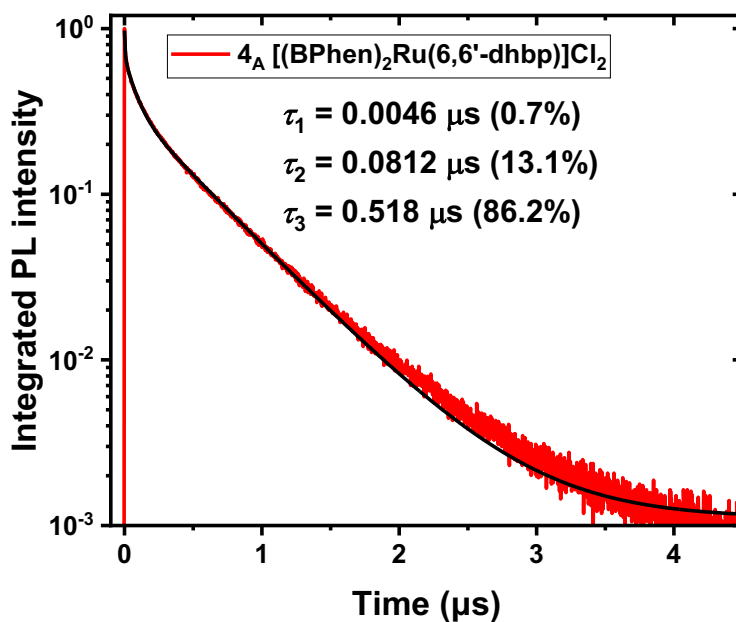

**Figure S20.** PL dynamics of 4<sub>A</sub> in deaerated acetonitrile excited at 404 nm. Percentage indicates the fraction of all light that is emitted through the corresponding channel.

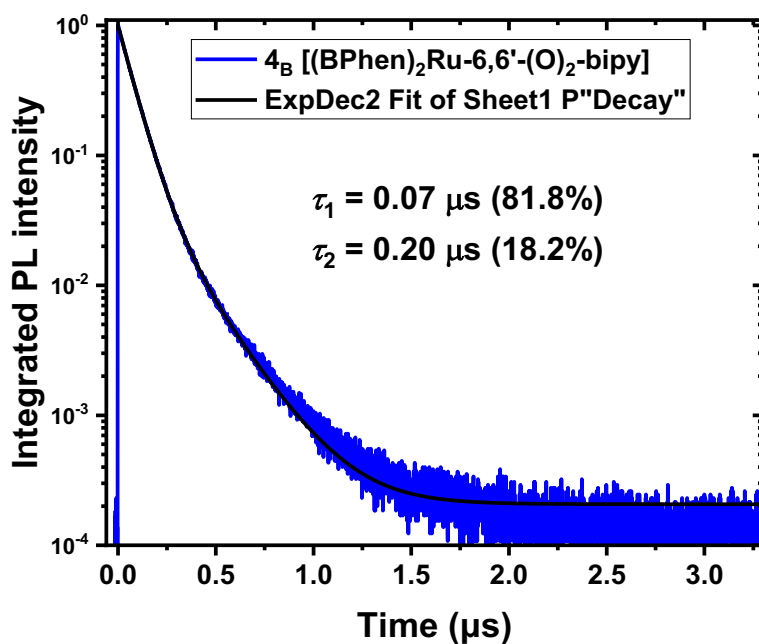

**Figure S21.** PL dynamics of 4<sub>B</sub> in deaerated acetonitrile excited at 404 nm. Percentage indicates the fraction of all light that is emitted through the corresponding channel.

## Complexes **5<sub>A</sub>** and **5<sub>B</sub>**

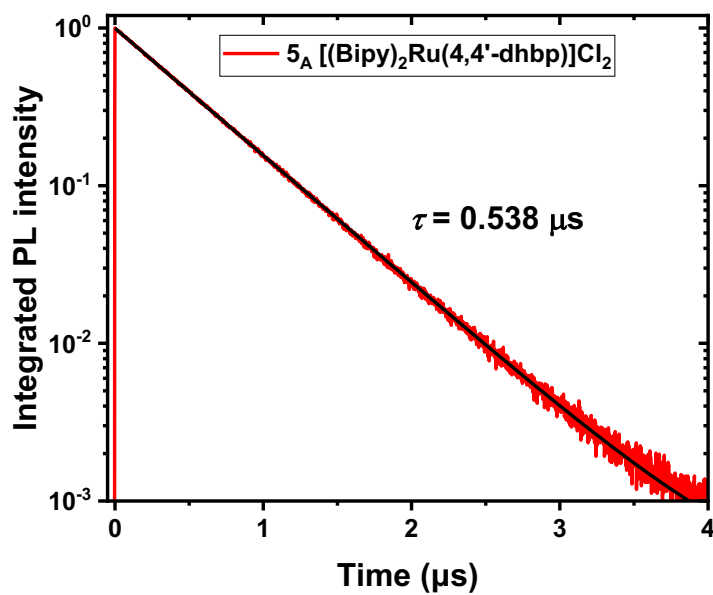

**Figure S22.** PL dynamics of **5<sub>A</sub>** in deaerated acetonitrile excited at 404 nm.

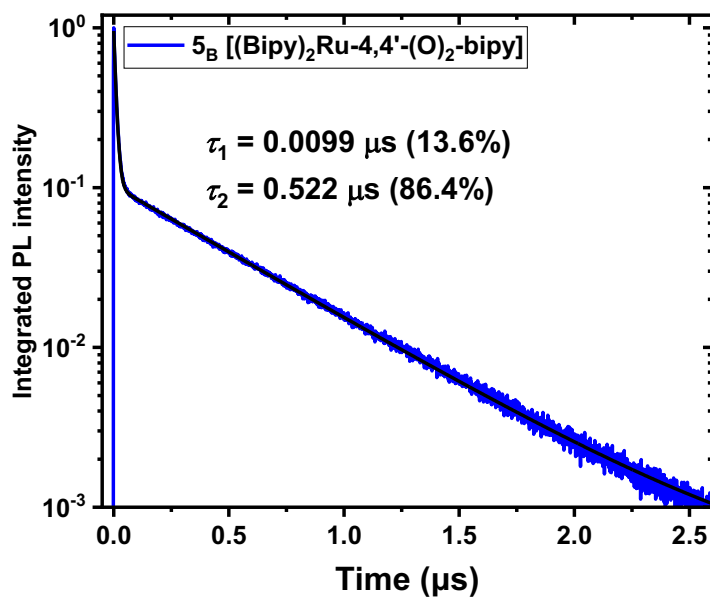

**Figure S23.** PL dynamics of **5<sub>B</sub>** in deaerated acetonitrile excited at 404 nm. Percentage indicates the fraction of all light that is emitted through the corresponding channel.

## Complexes **6<sub>A</sub>** and **6<sub>B</sub>**

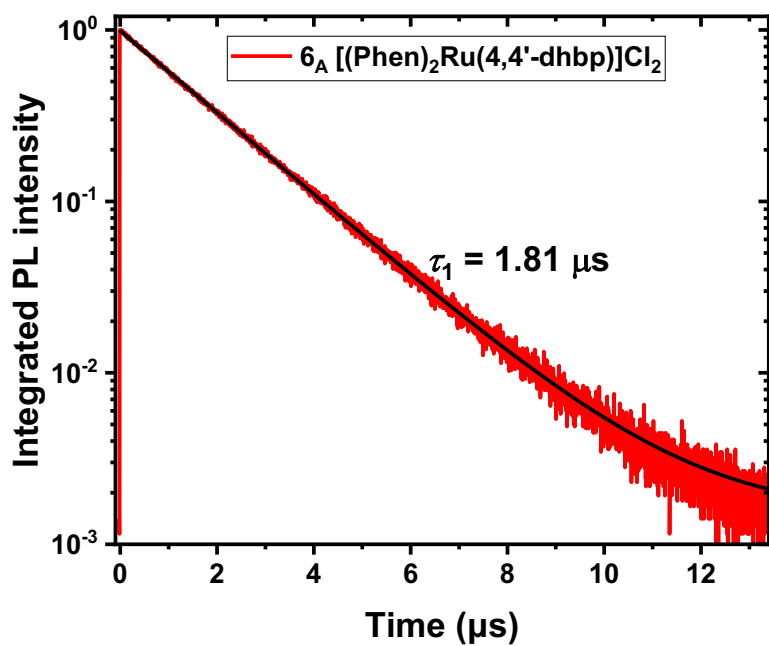

Figure S24. PL dynamics of **6<sub>A</sub>** in deaerated acetonitrile excited at 404 nm.

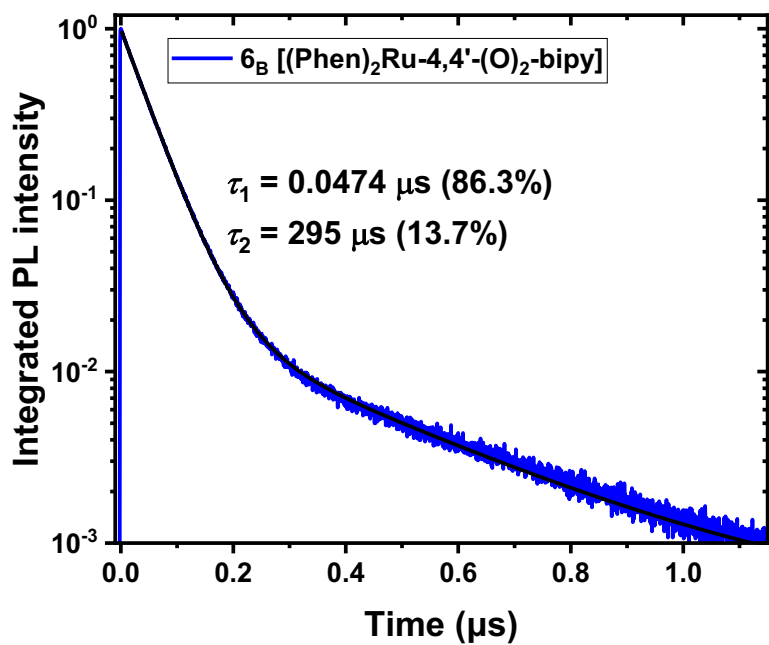

Figure S25. PL dynamics of **6<sub>B</sub>** in deaerated acetonitrile excited at 404 nm. Percentage indicates the fraction of all light that is emitted through the corresponding channel.

## Complexes $7_A$ and $7_B$

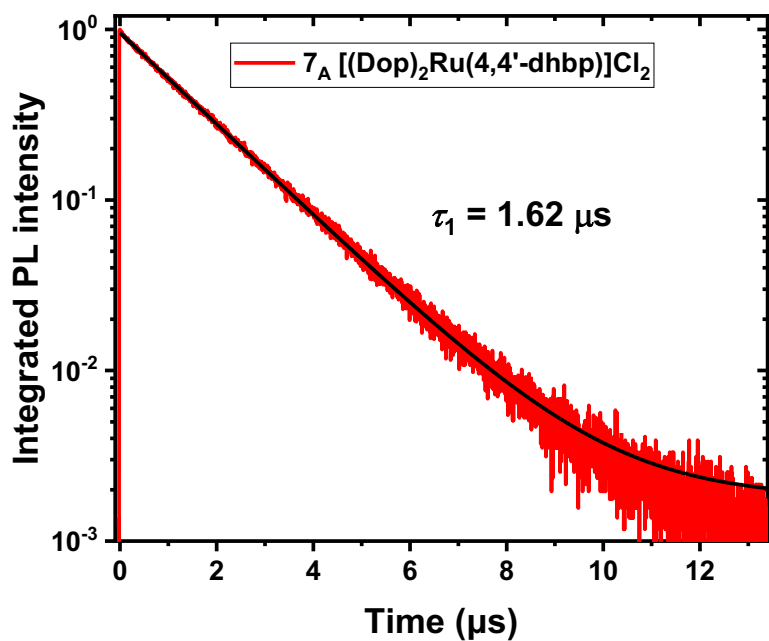

Figure S26. PL dynamics of  $7_A$  in deaerated acetonitrile excited at 404 nm.

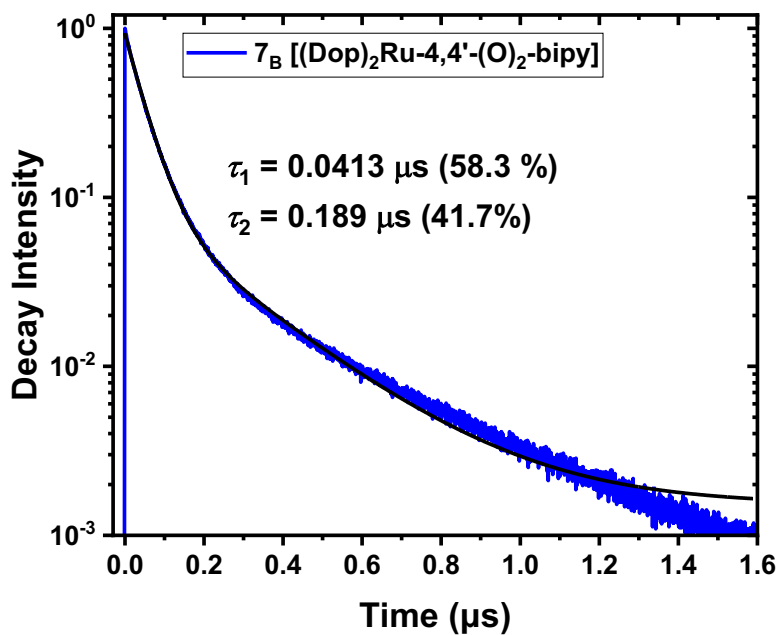

Figure S27. PL dynamics of  $7_B$  in deaerated acetonitrile excited at 404 nm. Percentage indicates the fraction of all light that is emitted through the corresponding channel.

## Complexes **8<sub>A</sub>** and **8<sub>B</sub>**

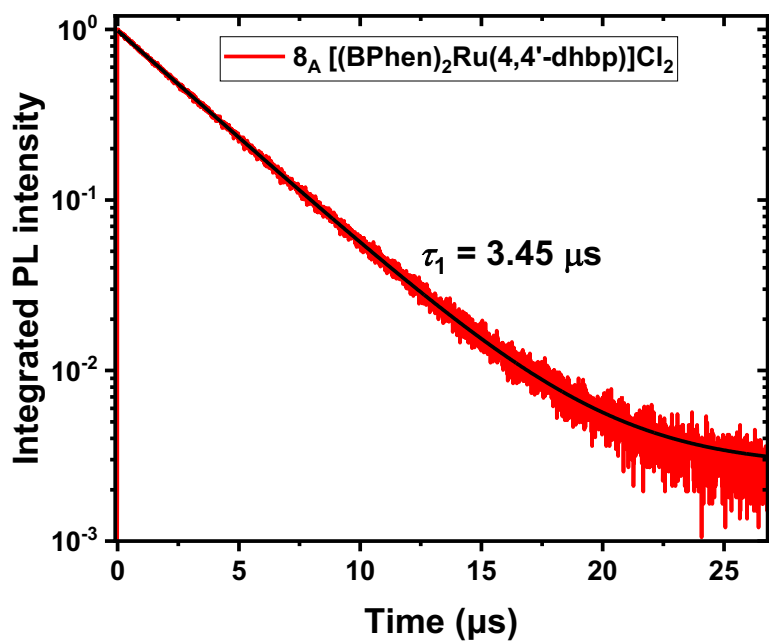

**Figure S28.** PL dynamics of **8<sub>A</sub>** in deaerated acetonitrile excited at 404 nm.

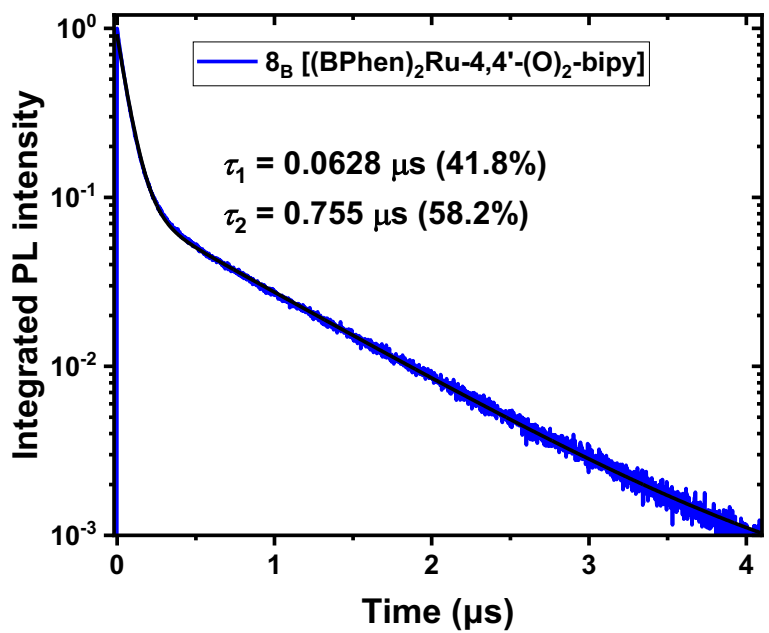

**Figure S29.** PL dynamics of **8<sub>B</sub>** in deaerated acetonitrile excited at 404 nm. Percentage indicates the fraction of all light that is emitted through the corresponding channel.

**Table S1.** Excitation wavelengths, photoluminescence quantum yield, emission wavelengths, luminescence lifetimes and singlet oxygen quantum yields of compounds [(bpy)<sub>3</sub>Ru]Cl<sub>2</sub>, **1<sub>A</sub>**-**8<sub>A</sub>** and **1<sub>B</sub>**-**8<sub>B</sub>**.

| Compound name                          | $\lambda_{\text{max or Exc}}$ (nm) | $\Phi_{\text{Lum}}$ (%) | $\lambda_{\text{Em}}$ (nm) | Luminescence Lifetime(s) ( $\tau$ ) ( $\mu\text{s}$ ) | Fraction of all light emitted through the corresponding channel |
|----------------------------------------|------------------------------------|-------------------------|----------------------------|-------------------------------------------------------|-----------------------------------------------------------------|
| [(Bpy) <sub>3</sub> Ru]Cl <sub>2</sub> | 451                                | 9.4                     | 617                        | 0.882                                                 | 100%                                                            |
| <b>1<sub>A</sub></b>                   | 461                                | 0.13                    | 630                        | 0.0040<br>0.0597<br>0.841                             | 18.7%<br>25.8%<br>55.4%                                         |
| <b>1<sub>B</sub></b>                   | 544                                | 0.04                    | 727                        | 0.0109<br>0.127                                       | 94.3%<br>5.7%                                                   |
| <b>2<sub>A</sub></b>                   | 455                                | 0.06                    | 612                        | 0.0014<br>0.335                                       | 12.9%<br>87.1%                                                  |
| <b>2<sub>B</sub></b>                   | 517                                | 0.29                    | 710                        | 0.0570<br>0.222                                       | 81.8%<br>18.2%                                                  |
| <b>3<sub>A</sub></b>                   | 467                                | 0.33                    | 610                        | 0.0026<br>0.0148<br>0.389                             | 9.6%<br>22.1%<br>68.3%                                          |
| <b>3<sub>B</sub></b>                   | 529                                | 0.34                    | 734                        | 0.0430<br>0.360                                       | 63.1%<br>36.9%                                                  |
| <b>4<sub>A</sub></b>                   | 471                                | 0.45                    | 640                        | 0.0046<br>0.0812<br>0.518                             | 0.7%<br>13.1%<br>86.2%                                          |
| <b>4<sub>B</sub></b>                   | 548                                | 0.17                    | 760                        | 0.0726<br>0.193                                       | 79.9%<br>20.1%                                                  |
| <b>5<sub>A</sub></b>                   | 466                                | 5.29                    | 650                        | 0.538                                                 | 100%                                                            |
| <b>5<sub>B</sub></b>                   | 527                                | 0.58                    | 775                        | 0.0099<br>0.522                                       | 13.6%<br>86.4%                                                  |
| <b>6<sub>A</sub></b>                   | 455                                | 12.85                   | 640                        | 1.81                                                  | 100%                                                            |
| <b>6<sub>B</sub></b>                   | 515                                | 0.25                    | 745                        | 0.0474<br>0.295                                       | 86.3%<br>13.7%                                                  |
| <b>7<sub>A</sub></b>                   | 473                                | 15.28                   | 640                        | 1.62                                                  | 100%                                                            |
| <b>7<sub>B</sub></b>                   | 528                                | 0.087                   | 763                        | 0.0413<br>0.189                                       | 58.3%<br>41.7%                                                  |
| <b>8<sub>A</sub></b>                   | 483                                | 18.69                   | 642                        | 3.45                                                  | 100%                                                            |
| <b>8<sub>B</sub></b>                   | 525                                | 0.5                     | 704                        | 0.0628<br>0.755                                       | 41.8%<br>58.2%                                                  |



**Table S2.** Structural Parameters from the Single Crystal X-Ray Diffraction Data for **7<sub>A</sub>**.

| Compound                     | <b>7<sub>A</sub></b>                                                             |
|------------------------------|----------------------------------------------------------------------------------|
| Formula                      | C <sub>38</sub> H <sub>34</sub> Cl <sub>2</sub> N <sub>6</sub> O <sub>9</sub> Ru |
| $D_{calc.}/\text{g cm}^{-3}$ | 1.599                                                                            |
| $\mu/\text{mm}^{-1}$         | 0.634                                                                            |
| Formula Weight               | 890.68                                                                           |
| Colour                       | dark red                                                                         |
| Shape                        | block                                                                            |
| Size/mm <sup>3</sup>         | 0.15×0.10×0.07                                                                   |
| $T/\text{K}$                 | 100.01(10)                                                                       |
| Crystal System               | orthorhombic                                                                     |
| Space Group                  | <i>Pbca</i>                                                                      |
| $a/\text{\AA}$               | 13.5194(2)                                                                       |
| $b/\text{\AA}$               | 18.9737(2)                                                                       |
| $c/\text{\AA}$               | 28.8521(4)                                                                       |
| $\alpha^\circ$               | 90                                                                               |
| $\beta^\circ$                | 90                                                                               |
| $\gamma^\circ$               | 90                                                                               |
| $V/\text{\AA}^3$             | 7400.94(17)                                                                      |
| $Z$                          | 8                                                                                |
| $Z'$                         | 1                                                                                |
| Wavelength/ $\text{\AA}$     | 0.71073                                                                          |
| Radiation type               | MoK $\alpha$                                                                     |
| $\theta_{min}/^\circ$        | 2.147                                                                            |
| $\theta_{max}/^\circ$        | 30.508                                                                           |
| Measured Refl.               | 59664                                                                            |
| Independent Refl.            | 11227                                                                            |
| Reflections with $I > 2(I)$  | 8573                                                                             |
| $R_{int}$                    | 0.0371                                                                           |
| Parameters                   | 526                                                                              |
| Restraints                   | 0                                                                                |
| Largest Peak                 | 1.612                                                                            |
| Deepest Hole                 | -1.256                                                                           |
| GooF                         | 1.032                                                                            |
| $wR_2$ (all data)            | 0.1391                                                                           |
| $wR_2$                       | 0.1295                                                                           |
| $R_I$ (all data)             | 0.0668                                                                           |
| $R_I$                        | 0.0478                                                                           |
